# Supplementary material for: Genomic and Glycolytic Entropy Are Reliable Radiogenomic Heterogeneity Biomarkers for Non-Small Cell Lung Cancer
Source: MDPI journal article supplement (doi:10.3390/ijms24043988), 2023-02-16
Supplement: s1 [file s1]

## Supplementary Materials

# Genomic and glycolytic entropy are reliable radiogenomic heterogeneity biomarkers for non-small cell lung cancer

Yu-Hung Chen <sup>1,2,3</sup>, Kun-Han Lue <sup>3</sup>, Chih-Bin Lin <sup>4</sup>, Kuang-Chi Chen <sup>5</sup>, Sheng-Chieh Chan <sup>1,2</sup>, Sung-Chao Chu <sup>2,6,\*</sup>, Bee-Song Chang <sup>7</sup>, and Yen-Chang Chen <sup>2,8</sup>

<sup>1</sup> Department of Nuclear Medicine, Hualien Tzu Chi Hospital, Buddhist Tzu Chi Medical Foundation, Hualien 97002, Taiwan

<sup>2</sup> School of Medicine, College of Medicine, Tzu Chi University, Hualien 97002, Taiwan

<sup>3</sup> Department of Medical Imaging and Radiological Sciences, Tzu Chi University of Science and Technology, Hualien 97005, Taiwan

<sup>4</sup> Department of Internal Medicine, Hualien Tzu Chi Hospital, Buddhist Tzu Chi Medical Foundation, Hualien 97002, Taiwan

<sup>5</sup> Department of Medical Informatics, Tzu-Chi University, Hualien, Taiwan

<sup>6</sup> Department of Hematology and Oncology, Hualien Tzu Chi Hospital, Buddhist Tzu Chi Medical Foundation, Hualien 97002, Taiwan

<sup>7</sup> Department of Cardiothoracic Surgery, Hualien Tzu Chi Hospital, Buddhist Tzu Chi Medical Foundation, Hualien 97002, Taiwan

<sup>8</sup> Department of Anatomical Pathology, Hualien Tzu Chi Hospital, Buddhist Tzu Chi Medical Foundation, Hualien

\* Correspondence: oldguy-chu1129@umail.hinet.net (Sung-Chao Chu); Tel.: +886-3-856-1825 ext 12020 (Sung-Chao Chu).

**Table S1.** Comparison of genomic features between different smoking, histology, and actionable EGFR mutation status.

| Variable                                                                                                                                                                                                                                                    | Smoking status |                | Histology |                |                |          | EGFR status    |                |          |
|-------------------------------------------------------------------------------------------------------------------------------------------------------------------------------------------------------------------------------------------------------------|----------------|----------------|-----------|----------------|----------------|----------|----------------|----------------|----------|
|                                                                                                                                                                                                                                                             | (mean ± SD)    |                |           | (mean ± SD)    |                |          | (mean ± SD)    |                |          |
|                                                                                                                                                                                                                                                             | Ever           | Never          | <i>p</i>  | Adenocar       | Squamou        | <i>p</i> | Mutant         | Wild           | <i>p</i> |
|                                                                                                                                                                                                                                                             | smoker (n =    | used (n =      |           | cinoma         | s cell (n =    |          | (n = 16)       | type (n =      |          |
|                                                                                                                                                                                                                                                             | 27)            | 19)            |           | (n = 35)       | 11)            |          |                | 30)            |          |
| TMBc                                                                                                                                                                                                                                                        | 20.7 ± 11.06   | 15.7 ± 2.59    | 0.033*    | 18.1 ± 8.37    | 20.3 ± 10.74   | 0.558    | 15.9 ± 2.94    | 20.1 ± 10.61   | 0.051    |
| TMBm                                                                                                                                                                                                                                                        | 14.0 ± 11.02   | 9.2 ± 2.62     | 0.038*    | 11.5 ± 8.37    | 13.7 ± 10.55   | 0.545    | 9.5 ± 2.94     | 13.4 ± 10.59   | 0.71     |
| MATHc                                                                                                                                                                                                                                                       | 47.8 ± 13.61   | 46.2 ± 16.10   | 0.723     | 47.0 ± 15.01   | 47.3 ± 13.57   | 0.958    | 46.6 ± 16.20   | 47.4 ± 13.85   | 0.885    |
| MATHm                                                                                                                                                                                                                                                       | 53.5 ± 13.38   | 58.3 ± 12.1    | 0.211     | 56.5 ± 12.35   | 52.1 ± 14.89   | 0.380    | 58.6 ± 11.89   | 53.8 ± 13.39   | 0.213    |
| Shannon entropy.c                                                                                                                                                                                                                                           | 2.8 ± 0.21     | 2.8 ± 0.11     | 0.323     | 2.8 ± 0.13     | 2.9 ± 0.25     | 0.159    | 2.8 ± 0.12     | 2.8 ± 0.20     | 0.866    |
| Shannon entropy.m                                                                                                                                                                                                                                           | 2.6 ± 0.26     | 2.6 ± 0.20     | 0.624     | 2.6 ± 0.20     | 2.7 ± 0.32     | 0.201    | 2.6 ± 0.19     | 2.6 ± 0.26     | 0.671    |
| SUVmax                                                                                                                                                                                                                                                      | 12.9 ± 7.61    | 10.6 ± 5.99    | 0.265     | 11.3 ± 5.81    | 14.1 ± 9.99    | 0.397    | 11.3 ± 5.89    | 12.3 ± 7.61    | 0.654    |
| MTV                                                                                                                                                                                                                                                         | 38.8 ± 69.3    | 16.3 ± 18.62   | 0.119     | 30.8 ± 60.42   | 25.3 ± 35.38   | 0.716    | 14.7 ± 16.06   | 37.3 ± 66.4    | 0.086    |
| TLG                                                                                                                                                                                                                                                         | 396.7 ± 813.66 | 141.1 ± 220.84 | 0.131     | 304.8 ± 713.17 | 247.8 ± 387.23 | 0.736    | 133.8 ± 203.35 | 375.0 ± 778.86 | 0.119    |
| Entropy                                                                                                                                                                                                                                                     | 4.3 ± 0.83     | 4.1 ± 0.87     | 0.389     | 4.2 ± 0.80     | 4.3 ± 1.00     | 0.722    | 4.2 ± 0.72     | 4.2 ± 0.91     | 0.912    |
| EGFR, epidermal growth factor receptor; SD, standard deviation; TMB, tumor mutation burden; MATH, mutant-allele tumor heterogeneity; SUV, standardized uptake value; MTV, metabolic tumor volume; TLG, total lesion glycolysis. *Statistically significant. |                |                |           |                |                |          |                |                |          |

**Figure S1.** The effect of PAF cutoff changes on the calculation of genomic heterogeneity.

The genomic heterogeneity features in a patient with a single-peaked MAF distribution pattern showed a minor shift when different PAF cutoffs were applied (a and b). In the bimodally distributed MAF pattern (c and d), the MATH shifts more apparently after PAF cutoffs change, whereas Shannon entropy showed only minor changes.

PAF, population allele frequency; MAF, mutant allele frequency; MAD, median absolute deviation; MATHc and MATHm, mutant-allele tumor heterogeneity based on PAF cutoffs of 1% and 0.01%; Shannon entropy.c and Shannon entropy.m, Shannon entropy based on PAF cutoffs of 1% and 0.01%.

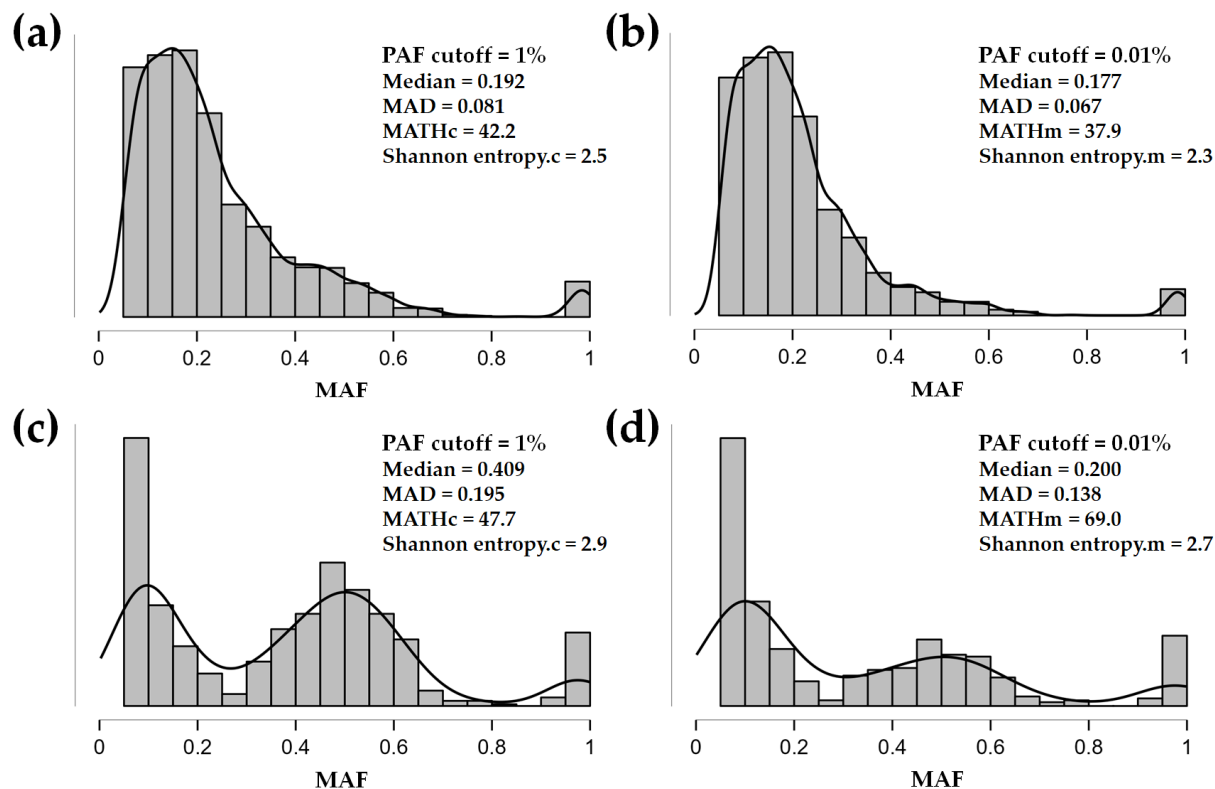

**Figure S2.** The ICC of  $^{18}\text{F}$ -FDG PET-derived radiomic features between standard ( $256 \times 256$ ) and reduced ( $128 \times 128$ ) image matrix sizes. Features were extracted on Pyradiomics 2.2.0 (Harvard Medical School, Boston, MA, USA) using a fixed bin size of 0.25 SUV.

$^{18}\text{F}$ -FDG PET,  $^{18}\text{F}$ -Fluorodeoxyglucose positron emission tomography; ICC, intraclass correlation coefficient; SUV, standardized uptake value; MTV, metabolic tumor volume; TLG, total lesion glycolysis; GLCM, Gray Level Co-occurrence Matrix; NGTDM, Neighbouring Gray Tone Difference Matrix; GLRLM, Gray Level Run Length Matrix; Gray Level Size Zone Matrix.

| ICC                             |       |        |        | ICC                       |       |        |        |
|---------------------------------|-------|--------|--------|---------------------------|-------|--------|--------|
| First-order features            | All   | MTV<10 | MTV>10 | GLRLM features            | All   | MTV<10 | MTV>10 |
| SUV <sub>max</sub>              | 0.99  | 0.96   | 0.992  | Short Run Emphasis        | 0.899 | 0.693  | 0.934  |
| MTV                             | 0.998 | 0.98   | 0.998  | Long Run Emphasis         | 0.732 | 0.625  | 0.733  |
| TLG                             | 0.995 | 0.991  | 0.995  | Gray Level Non-Uniformity | 0.495 | 0.491  | 0.498  |
| Entropy                         | 0.958 | 0.894  | 0.993  | Run Length Non-Uniformity | 0.486 | 0.485  | 0.486  |
| Skewness                        | 0.951 | 0.858  | 0.985  | Gray Level Variance       | 0.997 | 0.957  | 0.997  |
| Energy                          | 0.424 | 0.482  | 0.42   | Run Variance              | 0.657 | 0.588  | 0.653  |
| Kurtosis                        | 0.907 | 0.706  | 0.953  | Run Entropy               | 0.956 | 0.899  | 0.989  |
| GLCM features                   | All   | MTV<10 | MTV>10 | Run Percentage            | 0.884 | 0.676  | 0.914  |
| Cluster Prominence              | 0.947 | 0.892  | 0.946  | GLSZM features            | All   | MTV<10 | MTV>10 |
| Cluster Shade                   | 0.888 | 0.846  | 0.886  | Small Area Emphasis       | 0.795 | 0.774  | 0.865  |
| Cluster Tendency                | 0.98  | 0.935  | 0.98   | Large Area Emphasis       | 0.091 | 0.016  | 0.091  |
| Correlation                     | 0.883 | 0.857  | 0.685  | Gray Level Non-Uniformity | 0.606 | 0.387  | 0.608  |
| Maximum Correlation Coefficient | 0.129 | 0.583  | 0.043  | Size Zone Non-Uniformity  | 0.693 | 0.624  | 0.691  |
| Inverse Difference              | 0.976 | 0.94   | 0.991  | Gray Level Variance       | 0.996 | 0.927  | 0.998  |
| Inverse Difference Moment       | 0.969 | 0.912  | 0.99   | Zone Variance             | 0.092 | 0.009  | 0.092  |
| joint Energy                    | 0.38  | 0.234  | 0.965  | Zone Entropy              | 0.926 | 0.863  | 0.923  |
| joint Entropy                   | 0.87  | 0.787  | 0.92   | Zone Percentage           | 0.913 | 0.868  | 0.949  |
| Contrast                        | 0.826 | 0.837  | 0.827  |                           |       |        |        |
| NGTDM features                  | All   | MTV<10 | MTV>10 |                           |       |        |        |
| Busyness                        | 0.461 | 0.628  | 0.461  |                           |       |        |        |
| Coarseness                      | 0.727 | 0.691  | 0.579  |                           |       |        |        |
| Contrast                        | 0.271 | 0.192  | 0.759  |                           |       |        |        |
| Complexity                      | 0.964 | 0.89   | 0.694  |                           |       |        |        |
